# Supplementary material for: Differentiation impairs Bach1 dependent HO-1 activation and increases sensitivity to oxidative stress in SH-SY5Y neuroblastoma cells
Source: PubMed Central journal article supplement (PMC5548785; doi:10.1038/s41598-017-08095-7), 2017-08-08
Supplement: 41598_2017_8095_MOESM1_ESM.pdf [file 41598_2017_8095_MOESM1_ESM.pdf]

## **Supplementary information**

**Manuscript SREP -17-11560A**

### **Title**

**Differentiation impairs Bach1 dependent HO-1 activation and increases sensitivity to oxidative stress in SH-SY5Y neuroblastoma cells.**

### **Authors**

Sabrina Piras<sup>1</sup>, Anna Lisa Furfaro<sup>2</sup>, Lorenzo Brondolo<sup>1</sup>, Mario Passalacqua<sup>1</sup>, Umberto Maria Marinari<sup>1</sup>, Maria Adelaide Pronzato<sup>1</sup>, Mariapaola Nitti<sup>1</sup>

1 Department of Experimental Medicine, University of Genoa, Via L.B. Alberti 2, 16132, Genoa, Italy

2 Giannina Gaslini Institute, Via Gerolamo Gaslini 5, 16147, Genoa, Italy

Supplementary Fig.1

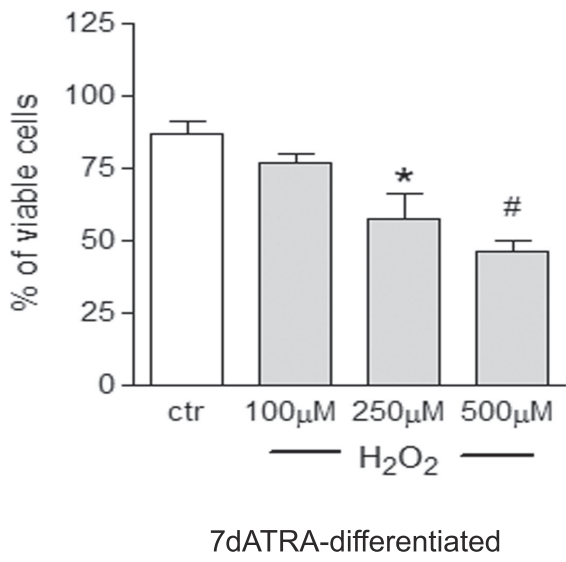

Supplementary Tab.1. Primer sequences used

| <b>Name</b> | <b>Primer Fw 5'-3'</b>         | <b>Primer Rv 5'-3'</b>        | <b>Size</b> |
|-------------|--------------------------------|-------------------------------|-------------|
| MAP-2       | tca gag gca atg acc tta cc     | gtg gta ggc tct tgg tct tt    | 320 bp      |
| NeuroD1     | ccc ttc ctt tga tgg acc cc     | aaa tgg tga aac tgg cgt gc    | 296 bp      |
| HO-1        | gtc caa cat cca gct ctt tga gg | gac aaa gtt cat ggc cct ggg a | 284 bp      |
| GCLM        | cca gat gtc ttg gaa tgc        | tgc agt caa atc tgg tgg       | 408 bp      |
| GCLC        | atg gag gtg caa tta aca gac    | act gca ttg cca cct ttg ca    | 206 bp      |
| Nrf2        | cct gag tta cag tgt ctt aa     | act gag tgt tct ggt gat g     | 499 bp      |
| Bach1       | tgc gat gtc acc atc ttt gt     | ggt ctg cag tgg agt cca aa    | 310 bp      |
| GAPDH       | gtc ttc acca cc atg gag aa     | atc cac agt ctt ctg ggt gg    | 266 bp      |
|             |                                |                               |             |
| HO-1 E1     | gct gcc caa acc act tct gt     | gcc ctt tea cct ccc acc ta    | 200 bp      |

Fig. 3b Full-length blots

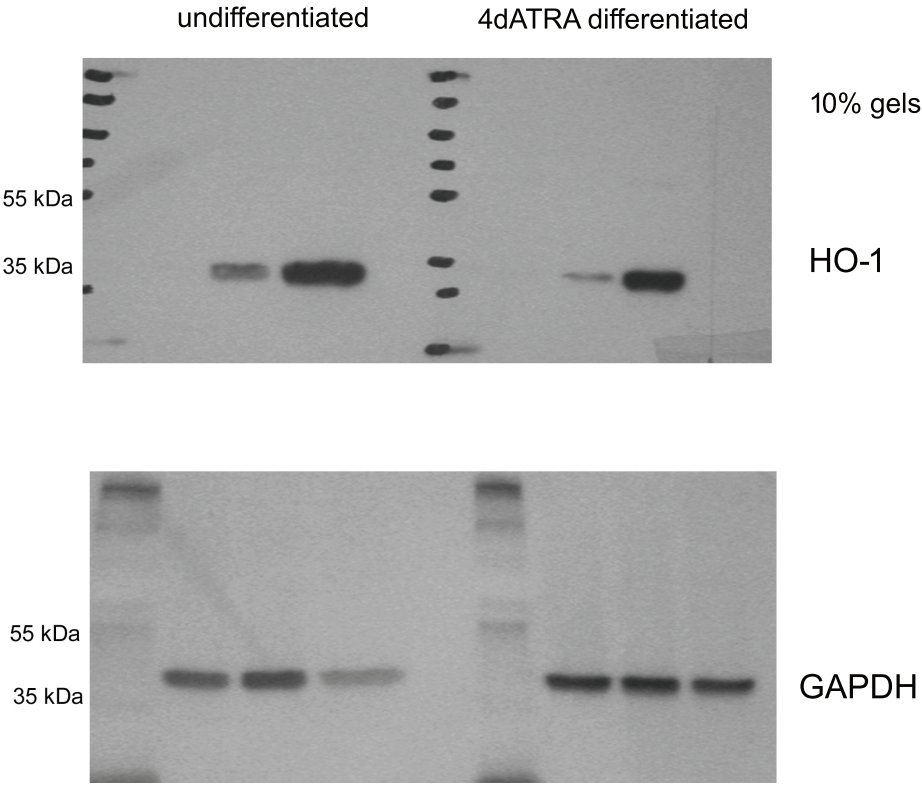

Fig. 4a Full-length blots

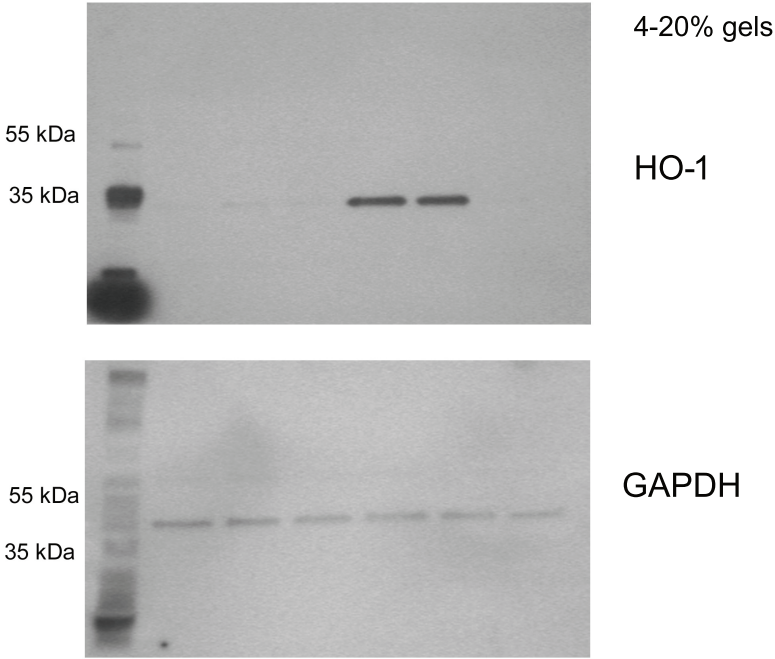

Fig. 5a and b, Full-length blots

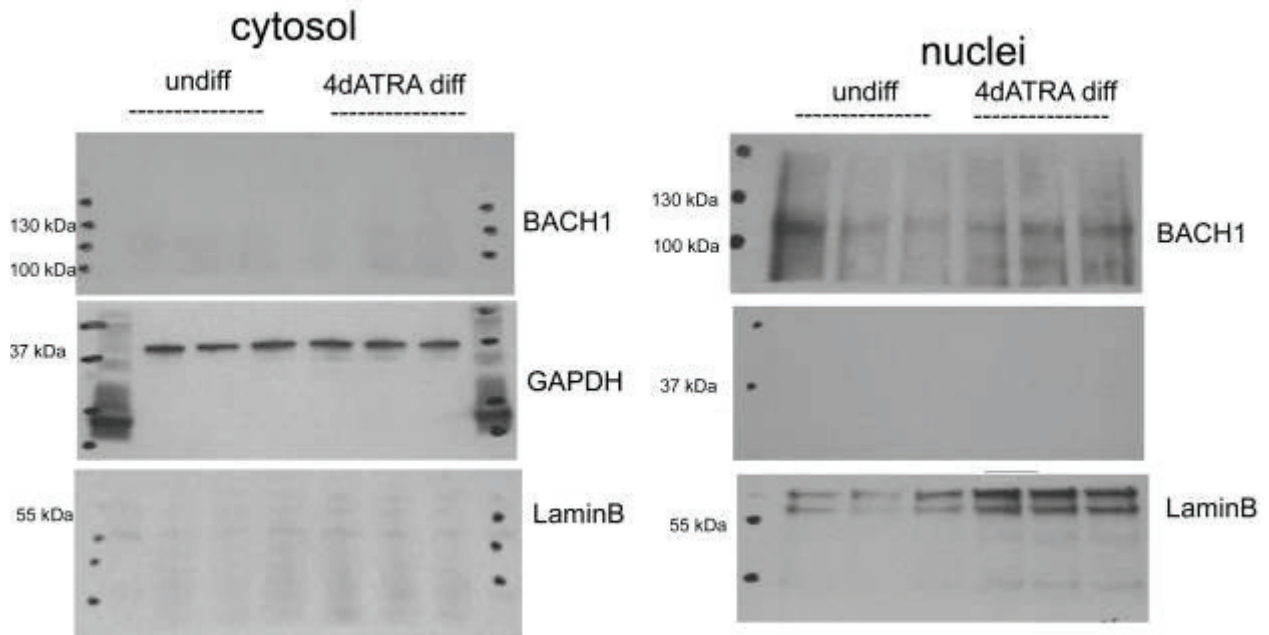

Fig. 5c and d, Full-length blots

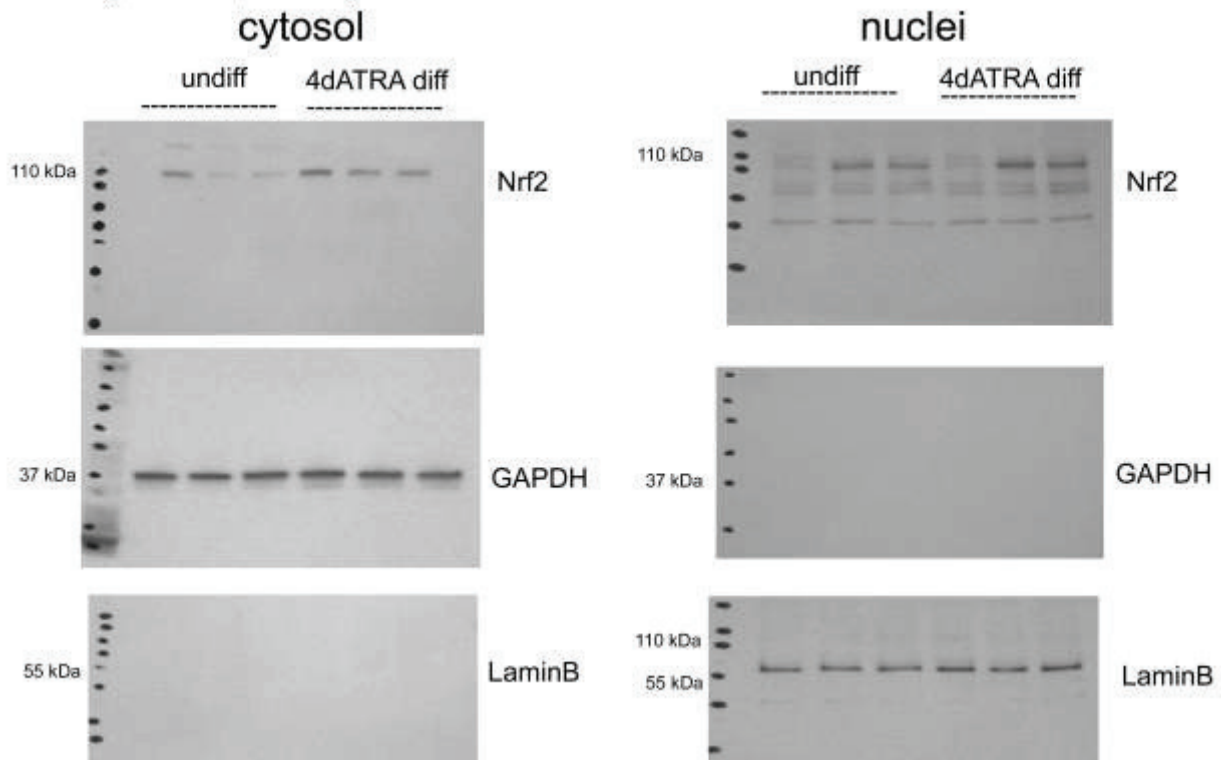

Fig. 6 Full-length gels

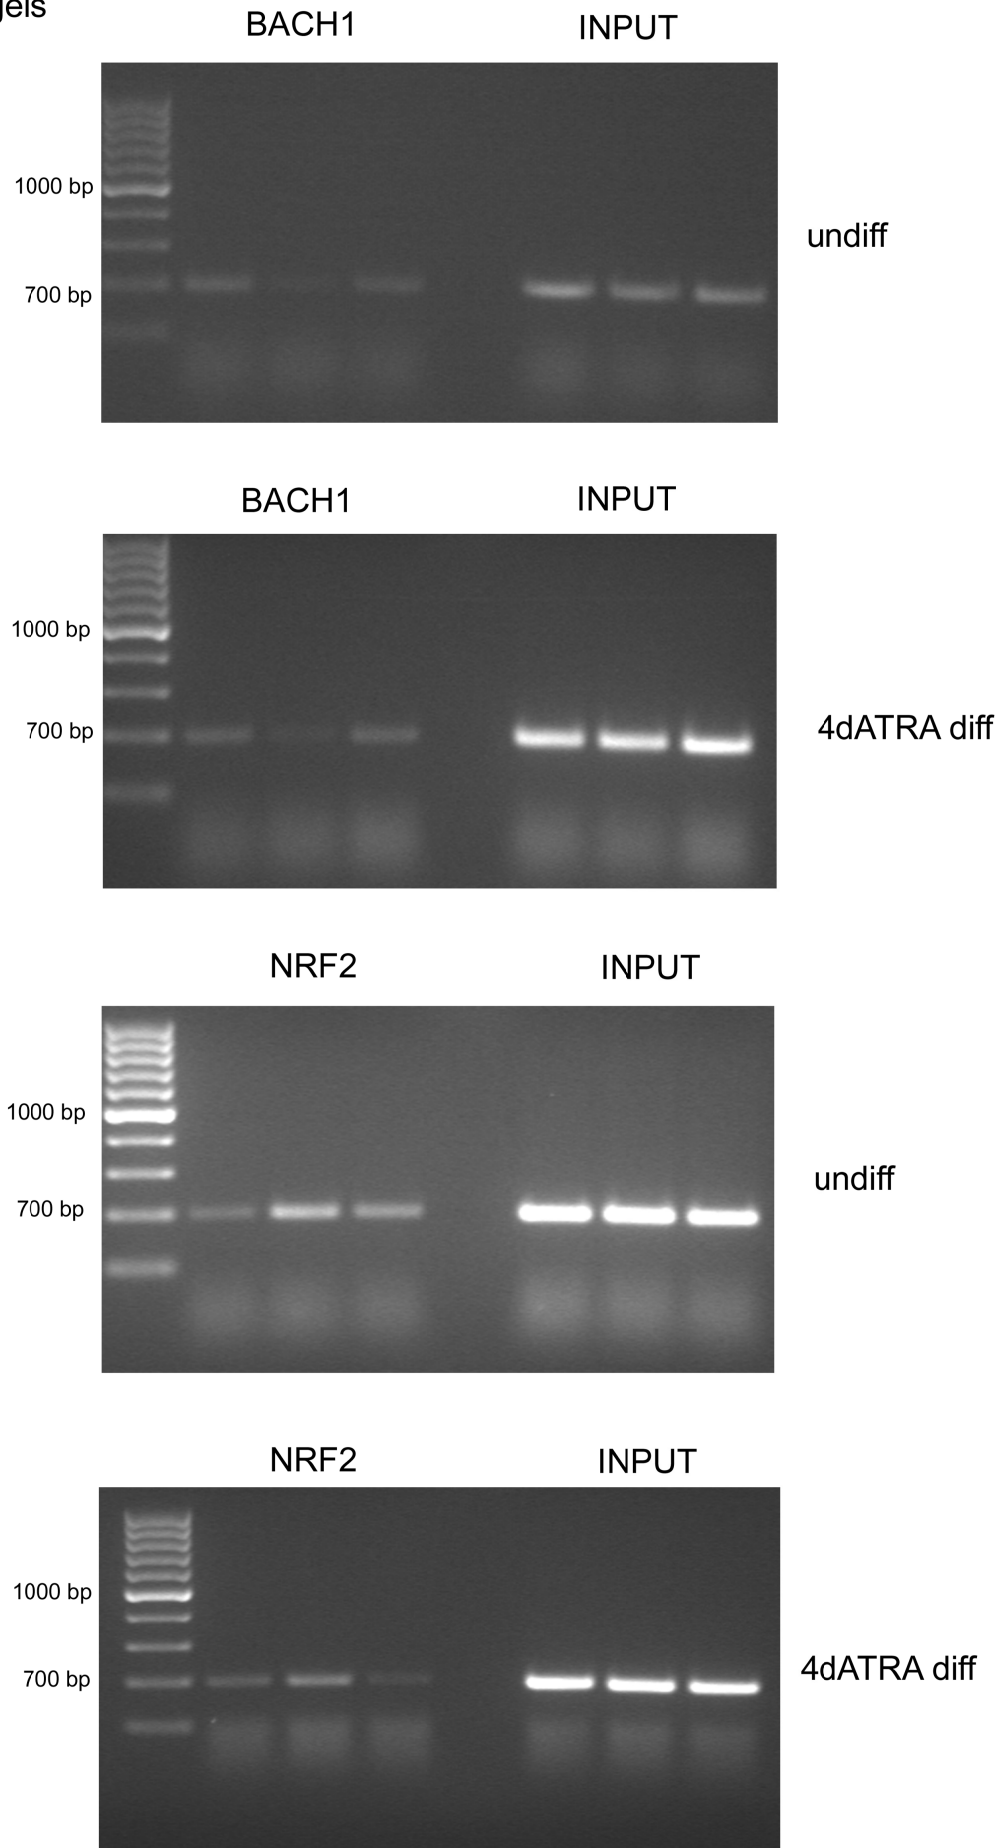

Fig. 6c Full-length gels

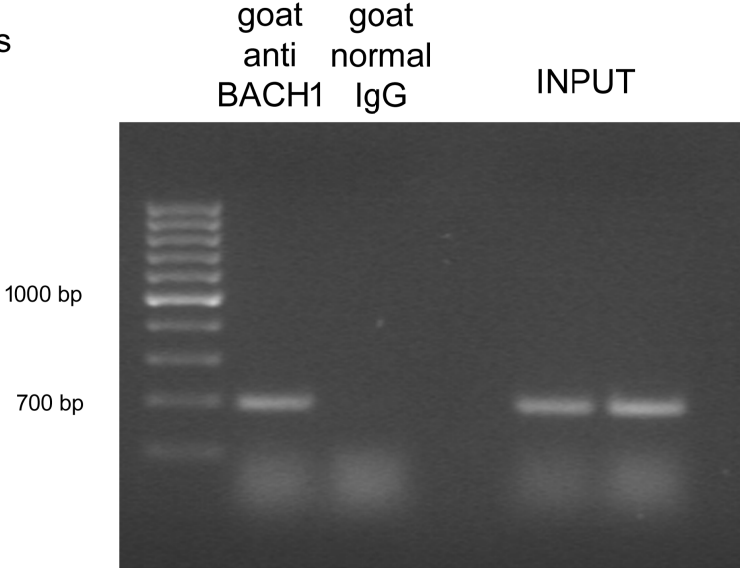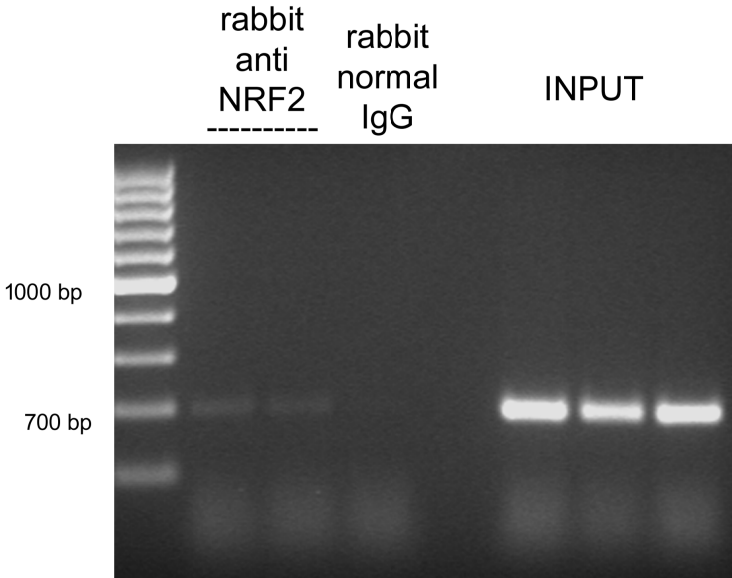

## Legends of Supplementary Information

### Supplementary Fig.1

Viability test (Trypan blue) 7dATRA-differentiated cells treated 24h with increasing concentrations of H<sub>2</sub>O<sub>2</sub> (100μM, 250μM and 500μM). Viability is decreased about 52% and 54% respectively at the highest doses of H<sub>2</sub>O<sub>2</sub>. Statistical analysis: n=3, \* p<0.05 vs ctr; # p<0.01 vs ctr.

### Supplementary Tab.1

Primer sequences used for the amplification of MAP2, NeuroD1, HO-1, GCLC, GCLM, Nrf2, Bach1 and GAPDH by RT-PCR analysis and for the amplification of the enhancer 1 in the promoter region of HO-1 (HO-1 E1) by ChIP

### Fig.3b Full-length blots

10% precast gels have been used to analyse HO-1 expression. Membranes have been stripped and reprobed for GAPDH. Molecular weights are indicated.

### Fig.4a Full-length blots

4-20% precast gradient gels have been used to analyse HO-1 expression. Membranes have been stripped and reprobed for GAPDH. Molecular weights are indicated.

### Fig.5a and b Full-length blots

7.5% precast gels have been used to analyse cytosolic and nuclear Bach1 expression. In order to save antibody, the membranes were cut and the upper part have been probed with anti Bach1 ab while the lower parts with anti GAPDH or anti lamin B abs to check the purity of cell fractioning and to normalize. Molecular weights are indicated.

### Fig.5c and d Full-length blots

10% precast gels have been used to analyse cytosolic and nuclear Nrf2 expression. The main band (110kDa) has been considered as the only one modulated by tBHQ treatment. Membranes have been stripped and reprobed with anti GAPDH or anti lamin B abs to check the purity of cell fractioning and to normalize. Molecular weights are indicated.

### Fig.6 Full-length gels



The amplification products of Bach1- and Nrf2-ARE binding site on E1 HO-1 promoter were analyzed in a 2% agarose gel stained with ethidium bromide and visualized under UV light. Molecular weights are indicated.
